# Supplementary material
Source: PubMed Central journal article supplement (PMC3033262)
Supplement: 1019082108_pnas.201019082SI.pdf [file 1019082108_pnas.201019082SI.pdf]

# Supporting Information

Qin et al. 10.1073/pnas.1019082108

Table S1. Genes up-regulated in Tregs compared with BDC and N79 cells

| Probe set ID | Fold change | Symbol              | Description                                                                    | GenBank accession no. |
|--------------|-------------|---------------------|--------------------------------------------------------------------------------|-----------------------|
| 10569017     | 534.23      | Ifitm3              | IFN-induced transmembrane protein 3                                            | NM_025378             |
| 10440002     | 528.55      | Gpr128              | G protein-coupled receptor 128                                                 | NM_172825             |
| 10476740     | 360.85      | Slc24a3             | Solute carrier family 24 (sodium/potassium/calcium exchanger), member 3        | NM_053195             |
| 10375443     | 343.18      | Havcr2              | Hepatitis A virus cellular receptor 2                                          | NM_134250             |
| 10471677     | 298.22      | Dab2ip              | Disabled homolog 2 ( <i>Drosophila</i> )-interacting protein                   | NM_001001602          |
| 10601867     | 219.22      | Kir3dl1             | KIR, three domains, long cytoplasmic tail, 1                                   | NM_177749             |
| 10606870     | 189.83      | Kir3dl2             | KIR, three domains, long cytoplasmic tail, 2                                   | NM_177748             |
| 10378286     | 176.23      | Itgae               | Integrin- $\alpha$ E, epithelial-associated                                    | NM_008399             |
| 10429580     | 172.85      |                     |                                                                                |                       |
| 10558769     | 137.04      |                     |                                                                                | ENSMUST0000 0026564   |
| 10570434     | 112.36      |                     |                                                                                | ENSMUST0000 0026564   |
| 10360173     | 85.49       | Slamf7              | SLAM family member 7                                                           | AK089525              |
| 10464400     | 76.91       | E330013 P04Rik      | RIKEN cDNA E330013P04 gene                                                     | BC076607              |
| 10552406     | 69.68       | Nkg7                | NK cell group 7 sequence                                                       | NM_024253             |
| 10357553     | 59.72       | Il24                | IL-24                                                                          | NM_053095             |
| 10392464     | 56.92       | BC029169            | cDNA sequence BC029169                                                         | BC023310              |
| 10538187     | 51.86       | Gpnmb               | Glycoprotein (transmembrane) nmb                                               | NM_053110             |
| 10522075     | 48.64       | Klhf5               | Kelch-like 5 ( <i>Drosophila</i> )                                             | NM_175174             |
| 10506274     | 47.23       | Dnajc6              | DnaJ (Hsp40) homolog, subfamily C, member 6                                    | NM_198412             |
| 10463005     | 42.83       | Cyp2c55             | Cytochrome P450, family 2, subfamily c, polypeptide 55                         | NM_028089             |
| 10396671     | 40.82       | Plekhg3             | Pleckstrin homology domain-containing, family G (with RhoGef domain), member 3 | NM_153804             |
| 10482528     | 40.48       | Neb                 | Nebulin                                                                        | NM_010889             |
| 10518989     | 39.76       | Trp73               | Transformation-related protein 73                                              | NM_011642             |
| 10534940     | 39.42       | Pilrb2              | Paired Ig-like type 2 receptor- $\beta$ 2                                      | NM_001024932          |
| 10441530     | 35.91       | Sytl3               | Synaptotagmin-like 3                                                           | NM_183370             |
| 10551542     | 34.14       |                     |                                                                                | ENSMUST0000 0032818   |
| 10428534     | 34.01       | Trps1               | Trichorhinophalangeal syndrome I (human)                                       | AK046585              |
| 10406736     | 32.24       | F2rl2               | Coagulation factor II (thrombin) receptor-like 2                               | NM_010170             |
| 10495107     | 31.92       | Adora3              | Adenosine A3 receptor                                                          | NM_009631             |
| 10574276     | 31.04       | Gpr97               | G protein-coupled receptor 97                                                  | NM_173036             |
| 10594825     | 29.57       | Aqp9                | Aquaporin 9                                                                    | NM_022026             |
| 10505445     | 28.11       | Orm3                | Orosomucoid 3                                                                  | NM_013623             |
| 10476443     | 28.09       | Plcb4               | Phospholipase C, $\beta$ 4                                                     | NM_013829             |
| 10432540     | 27.95       | Lima1               | LIM domain and actin-binding 1                                                 | NM_023063             |
| 10585338     | 25.92       | Kdelc2              | KDEL (Lys-Asp-Glu-Leu)-containing 2                                            | NM_212445             |
| 10500529     | 23.92       | Phgdh               | 3-phosphoglycerate dehydrogenase                                               | NM_016966             |
| 10558439     | 22.84       | Phgdh               | 3-phosphoglycerate dehydrogenase                                               | NM_016966             |
| 10401841     | 22.55       | Dio2                | Deiodinase, iodothyronine, type II                                             | NM_010050             |
| 10388211     | 22.52       | Spns3               | Spinster homolog 3 ( <i>Drosophila</i> )                                       | NM_029932             |
| 10428536     | 21.36       | Trps1               | Trichorhinophalangeal syndrome I (human)                                       | NM_032000             |
| 10411235     | 21.30       | Iqgap2              | IQ motif-containing GTPase-activating protein 2                                | NM_027711             |
| 10603182     | 19.90       | Arhgap6             | Rho GTPase-activating protein 6                                                | NM_009707             |
| 10519747     | 19.36       | Sema3e              | Sema domain, Ig domain (Ig), short basic domain, secreted, (semaphorin) 3E     | NM_011348             |
| 10439527     | 18.94       | ENSMUSG0 0000071552 | Predicted gene, ENSMUSG0000071552                                              | XM_001479949          |
| 10399908     | 18.86       | Prkar2b             | Protein kinase, cAMP-dependent regulatory, type II $\beta$                     | NM_011158             |
| 10493812     | 18.39       | S100a4              | S100 calcium-binding protein A4                                                | NM_011311             |
| 10593332     | 17.35       | Bco2                | $\beta$ -Carotene oxygenase 2                                                  | NM_133217             |
| 10466521     | 17.31       | Gcnt1               | Glucosaminyl ( <i>N</i> -acetyl) transferase 1, core 2                         | NM_173442             |
| 10516518     | 16.77       | Tlr12               | Toll-like receptor 12                                                          | NM_205823             |
| 10403816     | 16.11       | Tcr $\gamma$ -V4    | TCR- $\gamma$ , variable 4                                                     | X04699                |
| 10552919     | 16.11       | Hrc                 | Histidine-rich calcium-binding protein                                         | NM_010473             |
| 10397002     | 15.17       | Sipa1l1             | Signal-induced proliferation-associated 1-like 1                               | NM_172579             |
| 10487208     | 14.93       | Atp8b4              | ATPase, class I, type 8B, member 4                                             | NM_001080944          |

Table S1. Cont.

| Probe set ID | Fold change | Symbol         | Description                                                                                   | GenBank accession no. |
|--------------|-------------|----------------|-----------------------------------------------------------------------------------------------|-----------------------|
| 10542691     | 14.73       | Lrmp           | Lymphoid-restricted membrane protein                                                          | NM_008511             |
| 10485378     | 14.60       | 2600010 E01Rik | RIKEN cDNA 2600010E01 gene                                                                    | NM_175181             |
| 10476314     | 13.92       | Prnp           | Prion protein                                                                                 | NM_011170             |
| 10393341     | 13.91       | Rhbdf2         | Rhomboid 5 homolog 2 ( <i>Drosophila</i> )                                                    | NM_172572             |
| 10370210     | 13.50       | Col6a1         | Collagen, type VI, $\alpha$ 1                                                                 | NM_009933             |
| 10573451     | 13.02       | Syce2          | Synaptonemal complex central element protein 2                                                | NM_027954             |
| 10498576     | 12.81       | Lxn            | Latexin                                                                                       | NM_016753             |
| 10534935     | 12.79       | Pilrb1         | Paired Ig-like type 2 receptor- $\beta$ 1                                                     | NM_133209             |
| 10500899     | 12.78       | 7530404 M11Rik | RIKEN cDNA 7530404M11 gene                                                                    | NM_183224             |
| 10429573     | 12.60       | Ly6c2          | Lymphocyte antigen 6 complex, locus C2                                                        | NM_001099217          |
| 10601404     | 12.19       |                |                                                                                               |                       |
| 10498350     | 11.92       | P2ry14         | Purinergic receptor P2Y, G protein-coupled, 14                                                | NM_133200             |
| 10452648     | 11.86       | Emilin2        | Elastin microfibril interfacier 2                                                             | NM_145158             |
| 10547719     | 11.74       | Clstn3         | Calsyntenin 3                                                                                 | NM_153508             |
| 10498076     | 11.59       | Mam13          | Mastermind-like 3 ( <i>Drosophila</i> )                                                       | NM_001004176          |
| 10491272     | 11.37       |                |                                                                                               |                       |
| 10429568     | 11.29       | Ly6c1          | Lymphocyte antigen 6 complex, locus C1                                                        | NM_010741             |
| 10495794     | 10.81       | Pde5a          | Phosphodiesterase 5A, cGMP-specific                                                           | NM_153422             |
| 10380566     | 10.80       | Phospho1       | Phosphatase, orphan 1                                                                         | NM_153104             |
| 10538842     | 10.79       | Gng12          | Guanine nucleotide-binding protein (G protein), $\gamma$ 12                                   | NM_025278             |
| 10462702     | 10.25       | Hectd2         | HECT domain-containing 2                                                                      | NM_172637             |
| 10577217     | 10.10       | EG665516       | Predicted gene, EG665516                                                                      | XR_031967             |
| 10415111     | 10.07       | Bcl2l2         | Bcl2-like 2                                                                                   | NM_007537             |
| 10509441     | 10.01       | Ece1           | Endothelin-converting enzyme 1                                                                | NM_199307             |
| 10583551     | 9.15        | Pde4a          | Phosphodiesterase 4A, cAMP-specific                                                           | NM_183408             |
| 10569014     | 9.01        | Ifitm2         | IFN-induced transmembrane protein 2                                                           | NM_030694             |
| 10582082     | 8.94        | Slc38a8        | Solute carrier family 38, member 8                                                            | NM_001009950          |
| 10413086     | 8.84        | Adk            | Adenosine kinase                                                                              | NM_134079             |
| 10356299     | 8.58        | Gpr55          | G protein-coupled receptor 55                                                                 | NM_001033290          |
| 10586591     | 8.46        | Car12          | Carbonic anhydrase 12                                                                         | NM_178396             |
| 10399924     | 8.33        | Pik3cg         | Phosphoinositide-3-kinase, catalytic, $\gamma$ -polypeptide                                   | NM_020272             |
| 10383756     | 8.19        | Ifitm2         | IFN-induced transmembrane protein 2                                                           | NM_030694             |
| 10477595     | 7.54        | a              | Nonagouti                                                                                     | NM_015770             |
| 10395074     | 7.34        | Myt1l          | Myelin transcription factor 1-like                                                            | NM_001093775          |
| 10433057     | 7.26        | Calcoco1       | Calcium-binding and coiled-coil domain 1                                                      | NM_026192             |
| 10553299     | 7.12        |                |                                                                                               | ENSMUST0000 0081649   |
| 10366043     | 6.91        | Dusp6          | Dual specificity phosphatase 6                                                                | NM_026268             |
| 10425207     | 6.87        | H1f0           | $^1$ H histone family, member 0                                                               | NM_008197             |
| 10363901     | 6.60        | EG216082       | Predicted gene, EG216082                                                                      | NR_002887             |
| 10351873     | 6.29        | Pyhin1         | Pyrin and HIN domain family, member 1                                                         | BC107378              |
| 10557009     | 6.25        | Eef2k          | Eukaryotic elongation factor-2 kinase                                                         | NM_007908             |
| 10406982     | 6.22        | Adamts6        | A disintegrin-like and metallopeptidase (reprolysin type) with thrombospondin type 1 motif, 6 | NM_001081020          |
| 10468795     | 5.92        | Rab11fip2      | RAB11 family-interacting protein 2 (class I)                                                  | NM_001033172          |
| 10356475     | 5.77        | Arl4c          | ADP ribosylation factor-like 4C                                                               | NM_177305             |
| 10489891     | 5.64        | B4galt5        | UDP-Gal: $\beta$ GlcNAc- $\beta$ 1,4-galactosyltransferase, polypeptide 5                     | NM_019835             |
| 10570018     | 5.59        | Tnfsf13b       | TNF (ligand) superfamily, member 13b                                                          | NM_033622             |
| 10441422     | 5.58        | Zdhhc14        | Zinc finger, DHHC domain-containing 14                                                        | NM_146073             |
| 10541049     | 5.00        | MARCH8         | Membrane-associated ring finger (C3HC4) 8                                                     | NM_027920             |
| 10529890     | 4.82        |                |                                                                                               |                       |
| 10487359     | 4.77        | 1700041 B20Rik | RIKEN cDNA 1700041B20 gene                                                                    | BC130218              |
| 10362402     | 4.49        |                |                                                                                               |                       |
| 10488912     | 4.49        | Edem2          | ER degradation enhancer, mannosidase $\alpha$ -like 2                                         | NM_145537             |
| 10564909     | 4.39        | Man2a2         | Mannosidase 2, $\alpha$ 2                                                                     | NM_172903             |
| 10421309     | 4.39        | Slc39a14       | Solute carrier family 39 (zinc transporter), member 14                                        | NM_144808             |
| 10565890     | 4.37        | Dnajb13        | DnaJ (Hsp40)-related, subfamily B, member 13                                                  | NM_153527             |
| 10544114     | 4.28        | Hipk2          | Homeodomain-interacting protein kinase 2                                                      | NM_010433             |
| 10427131     | 4.24        | Soat2          | Sterol O-acyltransferase 2                                                                    | NM_146064             |
| 10470042     | 3.96        | Fut7           | Fucosyltransferase 7                                                                          | NM_013524             |
| 10454632     | 3.85        | Camk4          | Calcium/calmodulin-dependent protein kinase IV                                                | NM_009793             |
| 10392701     | 3.30        | Slc39a11       | Solute carrier family 39 (metal ion transporter), member 11                                   | NM_027216             |
| 10482687     | 3.28        | Arl5a          | ADP ribosylation factor-like 5A                                                               | NM_182994             |
| 10397645     | 3.08        | Gpr65          | G protein-coupled receptor 65                                                                 | NM_008152             |
| 10346224     | 3.06        | 5330401 P04Rik | RIKEN cDNA 5330401P04 gene                                                                    | BC028796              |

**Table S2. Genes down-regulated in Treg compared with BDC and N79 cells**

| Probe set ID | Fold change | Symbol         | Description                                                         | GenBank accession no. |
|--------------|-------------|----------------|---------------------------------------------------------------------|-----------------------|
| 10364030     | -808.86     | Adora2a        | Adenosine A2a receptor                                              | NM_009630             |
| 10489484     | -417.24     | Sdc4           | Syndecan 4                                                          | NM_011521             |
| 10606369     | -409.53     | Itm2a          | Integral membrane protein 2A                                        | NM_008409             |
| 10495854     | -397.71     | Prss12         | Protease, serine, 12 neurotrypsin (motopsin)                        | NM_008939             |
| 10483178     | -324.18     | Cobl1          | Cobl-like 1                                                         | NM_177025             |
| 10473125     | -302.11     |                |                                                                     |                       |
| 10363231     | -298.95     | Smpd13a        | Sphingomyelin phosphodiesterase, acid-like 3A                       | NM_020561             |
| 10560709     | -243.76     |                |                                                                     |                       |
| 10474836     | -236.09     | Ivd            | Isovaleryl CoA dehydrogenase                                        | NM_019826             |
| 10442396     | -232.16     | Abca3          | ATP-binding cassette, subfamily A (ABC1), member 3                  | NM_013855             |
| 10501586     | -230.65     | S1pr1          | Sphingosine-1-phosphate receptor 1                                  | NM_007901             |
| 10484318     | -190.52     | Nckap1         | NCK-associated protein 1                                            | NM_016965             |
| 10466040     | -182.69     | Cd5            | CD5 antigen                                                         | NM_007650             |
| 10436967     | -164.85     | Cbr1           | Carbonyl reductase 1                                                | NM_007620             |
| 10593225     | -146.89     | Zbtb16         | Zinc finger and BTB domain-containing 16                            | NM_001033324          |
| 10407072     | -143.76     | Elovl7         | ELOVL family member 7, elongation of long-chain fatty acids (yeast) | NM_029001             |
| 10414860     | -140.28     |                |                                                                     |                       |
| 10414754     | -140.28     |                |                                                                     |                       |
| 10600504     | -129.56     | Fundc2         | FUN14 domain-containing 2                                           | NM_026126             |
| 10540897     | -126.83     | Pparg          | Peroxisome proliferator-activated receptor- $\gamma$                | NM_011146             |
| 10509568     | -125.03     | Camk2n1        | Calcium/calmodulin-dependent protein kinase II inhibitor 1          | NM_025451             |
| 10505030     | -122.44     | Fsd1l          | Fibronectin type III and SPRY domain-containing 1-like              | NM_176966             |
| 10493990     | -121.64     | S100a11        | S100 calcium-binding protein A11 (calgizzarin)                      | NM_016740             |
| 10505008     | -121.15     | Slc44a1        | Solute carrier family 44, member 1                                  | NM_133891             |
| 10461553     | -121.01     | A430093 F15Rik | RIKEN cDNA A430093F15 gene                                          | BC064125              |
| 10466054     | -117.01     | Cd6            | CD6 antigen                                                         | NM_009852             |
| 10383210     | -108.94     |                |                                                                     |                       |
| 10349383     | -108.56     | Slc35f5        | Solute carrier family 35, member F5                                 | NM_028787             |
| 10383214     | -107.56     | Rnf213         | Ring finger protein 213                                             | NM_001040005          |
| 10458028     | -103.02     | Gypc           | Glycophorin C                                                       | NM_001048207          |
| 10457640     | -100.64     | S100a11        | S100 calcium-binding protein A11 (calgizzarin)                      | NM_016740             |
| 10483228     | -99.44      | Scn3a          | Sodium channel, voltage-gated, type III $\alpha$                    | NM_018732             |
| 10469110     | -89.78      | Usp6nl         | USP6 N terminal-like                                                | NM_001080548          |
| 10367634     | -85.21      | Akap12         | A kinase (PRKA) anchor protein (gravin) 12                          | NM_031185             |
| 10547807     | -81.83      | Eno2           | Enolase 2, $\gamma$ -neuronal                                       | NM_013509             |
| 10420198     | -78.40      | Ripk3          | Receptor-interacting serine-threonine kinase 3                      | NM_019955             |
| 10519951     | -77.82      | A530088 I07Rik | RIKEN cDNA A530088I07 gene                                          | NM_175437             |
| 10362959     | -75.68      | Popdc3         | Popeye domain-containing 3                                          | NM_024286             |
| 10603567     | -68.97      | Dynlt3         | Dynein light chain Tctex-type 3                                     | NM_025975             |
| 10459905     | -68.34      | Setbp1         | SET-binding protein 1                                               | NM_053099             |
| 10595480     | -67.31      | Me1            | Malic enzyme 1, NADP(+)-dependent, cytosolic                        | NM_008615             |
| 10504755     | -66.61      |                |                                                                     |                       |
| 10496813     | -66.20      | Ctbs           | Chitinase, di-N-acetyl-                                             | NM_028836             |
| 10383204     | -65.84      |                |                                                                     |                       |
| 10363118     | -64.82      | Dcbld1         | Discoidin, CUB and LCCL domain-containing 1                         | NM_025705             |
| 10472350     | -64.04      | Gca            | Grancalcin                                                          | NM_145523             |
| 10412123     | -63.35      | EG668181       | Predicted gene, EG668181                                            | XR_032778             |
| 10470182     | -62.65      | Bmyc           | Brain-expressed myelocytomatosis oncogene                           | NM_023326             |
| 10474129     | -61.03      | E430002 G05Rik | RIKEN cDNA E430002G05 gene                                          | NM_173749             |
| 10598586     | -58.73      | Xk             | Kell blood group precursor (McLeod phenotype) homolog               | NM_023500             |
| 10603551     | -57.30      | Cybb           | Cytochrome <i>b</i> -245, $\beta$ -polypeptide                      | NM_007807             |
| 10565712     | -51.99      | Phca           | Phytoceramidase, alkaline                                           | NM_025408             |
| 10542842     | -51.87      | Ccdc91         | Coiled-coil domain-containing 91                                    | NM_025911             |
| 10462603     | -51.29      | Fas            | Fas (TNF receptor superfamily member 6)                             | NM_007987             |
| 10372028     | -51.22      | Plxnc1         | Plexin C1                                                           | NM_018797             |
| 10361323     | -50.88      | Cnksr3         | Cnksr family member 3                                               | NM_172546             |
| 10396440     | -50.04      | EG277089       | Predicted gene, EG277089                                            | XM_204772             |
| 10411668     | -49.59      | Ocln           | Occludin                                                            | NM_008756             |
| 10545827     | -49.34      | Rab11fip5      | RAB11 family-interacting protein 5 (class I)                        | NM_001003955          |
| 10369102     | -48.99      |                |                                                                     |                       |
| 10379765     | -47.82      | Hnf1b          | HNF1 homeobox B                                                     | NM_009330             |

Table S2. Cont.

| Probe set ID | Fold change | Symbol         | Description                                                                  | GenBank accession no. |
|--------------|-------------|----------------|------------------------------------------------------------------------------|-----------------------|
| 10462507     | -47.76      | Papss2         | 3'-phosphoadenosine 5'-phosphosulfate synthase 2                             | NM_011864             |
| 10561702     | -47.09      | Kcnk6          | Potassium inwardly-rectifying channel, subfamily K, member 6                 | BC115791              |
| 10549504     | -46.34      | D030011 O10Rik | RIKEN cDNA D030011O10 gene                                                   | NM_177192             |
| 10414885     | -45.27      |                |                                                                              |                       |
| 10414778     | -45.27      |                |                                                                              |                       |
| 10505028     | -45.26      | Slc44a1        | Solute carrier family 44, member 1                                           | AK141895              |
| 10457536     | -45.26      |                |                                                                              |                       |
| 10417620     | -44.64      | Fezf2          | Fez family zinc finger 2                                                     | NM_080433             |
| 10392642     | -44.40      | Abca5          | ATP-binding cassette, subfamily A (ABC1), member 5                           | NM_147219             |
| 10350046     | -42.29      | Jarid1b        | Jumonji, AT-rich interactive domain 1B (Rbp2-like)                           | NM_152895             |
| 10565345     | -41.51      |                |                                                                              |                       |
| 10522827     | -40.31      | Csn1s1         | Casein- $\alpha$ 1                                                           | NM_007784             |
| 10355456     | -39.94      | Mreg           | Melanoregulin                                                                | NM_001005423          |
| 10414950     | -39.76      | LOC630426      | Hypothetical protein LOC630426                                               | XR_030843             |
| 10404250     | -39.56      | Dcdc2a         | Doublecortin domain-containing 2a                                            | NM_177577             |
| 10401935     | -37.68      | BC005685       | cDNA sequence BC005685                                                       | BC005685              |
| 10355312     | -35.90      | Ikzf2          | IKAROS family zinc finger 2                                                  | NM_011770             |
| 10383202     | -35.02      |                |                                                                              |                       |
| 10344924     | -34.70      | Xkr9           | X Kell blood group precursor-related family member 9 homolog                 | NM_001011873          |
| 10503508     | -34.66      | Ggh            | $\gamma$ -Glutamyl hydrolase                                                 | NM_010281             |
| 10503523     | -34.66      |                |                                                                              | ENSMUST0000 0029904   |
| 10411226     | -34.60      | F2r1           | Coagulation factor II (thrombin) receptor-like 1                             | NM_007974             |
| 10403796     | -34.22      | Amph           | Amphiphysin                                                                  | NM_175007             |
| 10468722     | -33.71      | Gfra1          | Glial cell line-derived neurotrophic factor family receptor- $\alpha$ 1      | NM_010279             |
| 10472820     | -32.55      | Itga6          | Integrin- $\alpha$ 6                                                         | NM_008397             |
| 10466976     | -32.54      | Gldc           | Glycine decarboxylase                                                        | NM_138595             |
| 10489985     | -31.91      | Atp9a          | ATPase, class II, type 9A                                                    | NM_015731             |
| 10383233     | -31.56      |                |                                                                              |                       |
| 10531919     | -31.10      | Hsd17b11       | Hydroxysteroid (17- $\beta$ ) dehydrogenase 11                               | NM_053262             |
| 10592050     | -30.99      | Barx2          | BarH-like homeobox 2                                                         | NM_013800             |
| 10599976     | -30.79      | Mtm1           | X-linked myotubular myopathy gene 1                                          | NM_019926             |
| 10366229     | -29.90      | Lin7a          | Lin-7 homolog A ( <i>Caenorhabditis elegans</i> )                            | NM_001039354          |
| 10423230     | -29.78      | Cdh9           | Cadherin 9                                                                   | XM_986179             |
| 10551852     | -28.75      | Clip3          | CAP-GLY domain-containing linker protein 3                                   | NM_001081114          |
| 10522051     | -28.66      | Klf3           | Kruppel-like factor 3 (basic)                                                | NM_008453             |
| 10530841     | -27.90      | Igfbp7         | Insulin-like growth factor-binding protein 7                                 | NM_008048             |
| 10538802     | -27.71      |                |                                                                              |                       |
| 10373768     | -26.67      | Selm           | Selenoprotein M                                                              | NM_053267             |
| 10383208     | -26.34      |                |                                                                              |                       |
| 10490826     | -26.18      |                |                                                                              |                       |
| 10503835     | -26.16      | Rragd          | Ras-related GTP-binding D                                                    | NM_027491             |
| 10363210     | -25.90      | Pkib           | Protein kinase inhibitor- $\beta$ , cAMP-dependent, testis-specific          | NM_001039053          |
| 10571162     | -25.89      | Eif4ebp1       | Eukaryotic translation initiation factor 4E-binding protein 1                | NM_007918             |
| 10383168     | -25.69      |                |                                                                              |                       |
| 10365833     | -24.75      |                |                                                                              | ENSMUST0000 0095333   |
| 10352194     | -24.63      | Cdc42bpa       | Cdc42-binding protein kinase- $\alpha$                                       | BC096679              |
| 10399421     | -24.59      | Mycn           | V-myc myelocytomatosis viral-related oncogene, neuroblastoma-derived (avian) | NM_008709             |
| 10519612     | -23.98      |                |                                                                              |                       |
| 10538290     | -23.69      | Snx10          | Sorting nexin 10                                                             | NM_028035             |
| 10351095     | -23.56      | Tnfsf4         | TNF (ligand) superfamily, member 4                                           | NM_009452             |
| 10383152     | -23.54      | LOC672511      | Hypothetical LOC672511                                                       | XM_001477846          |
| 10383198     | -23.49      |                |                                                                              |                       |
| 10368918     | -22.48      | Sobp           | Sine oculis-binding protein homolog ( <i>Drosophila</i> )                    | NM_175407             |
| 10450367     | -22.00      | Hspa1b         | Heat shock protein 1B                                                        | NM_010478             |
| 10419288     | -21.37      | Gch1           | GTP cyclohydrolase 1                                                         | NM_008102             |
| 10483215     | -20.96      | Scn3a          | Sodium channel, voltage-gated, type III $\alpha$                             | NM_018732             |
| 10383200     | -20.57      |                |                                                                              |                       |

Table S2. Cont.

| Probe set ID | Fold change | Symbol    | Description                                                                             | GenBank accession no. |
|--------------|-------------|-----------|-----------------------------------------------------------------------------------------|-----------------------|
| 10548030     | -20.36      | Cd9       | CD9 antigen                                                                             | NM_007657             |
| 10436865     | -20.17      | Ifngr2    | IFN- $\gamma$ receptor 2                                                                | NM_008338             |
| 10383212     | -20.01      |           |                                                                                         |                       |
| 10372831     | -19.11      |           |                                                                                         |                       |
| 10523156     | -18.59      | Cxcl2     | Chemokine (C-X-C motif) ligand 2                                                        | NM_009140             |
| 10565089     | -18.55      | Cpeb1     | Cytoplasmic polyadenylation element-binding protein 1                                   | NM_007755             |
| 10450226     | -18.16      | Ppt2      | Palmitoyl-protein thioesterase 2                                                        | NM_019441             |
| 10436456     | -18.10      | Pros1     | Protein S ( $\alpha$ )                                                                  | NM_011173             |
| 10383502     | -17.97      | Slc16a3   | Solute carrier family 16 (monocarboxylic acid transporters), member 3                   | NM_001038653          |
| 10587495     | -17.88      | Irak1bp1  | IL-1 receptor-associated kinase 1-binding protein 1                                     | NM_022986             |
| 10435305     | -17.67      | Itgb5     | Integrin $\beta$ 5                                                                      | NM_010580             |
| 10590060     | -17.60      | Ctdspl    | CTD (carboxyl-terminal domain, RNA polymerase II, polypeptide A) small phosphatase-like | NM_133710             |
| 10438791     | -17.24      | Uts2d     | Urotensin 2 domain-containing                                                           | NM_198166             |
| 10414741     | -17.18      |           |                                                                                         |                       |
| 10368175     | -16.87      | Pde7b     | Phosphodiesterase 7B                                                                    | NM_013875             |
| 10408613     | -16.03      | Tubb2b    | Tubulin, $\beta$ 2b                                                                     | NM_023716             |
| 10538890     | -15.94      | LOC641050 | Hypothetical protein LOC641050                                                          | M11024                |
| 10404069     | -15.33      | Hist1h1a  | Histone cluster 1, H1a                                                                  | NM_030609             |
| 10364950     | -14.55      | Gadd45b   | Growth arrest and DNA damage-inducible 45- $\beta$                                      | NM_008655             |
| 10410124     | -13.48      | Ctsl      | Cathepsin L                                                                             | NM_009984             |
| 10357158     | -13.36      | Ralb      | V-ral simian leukemia viral oncogene homolog B (ras-related)                            | NM_022327             |
| 10504753     | -13.31      |           |                                                                                         |                       |
| 10349724     | -12.79      | Rab711    | RAB7, member RAS oncogene family-like 1                                                 | NM_144875             |
| 10366774     | -12.47      | Avil      | Avillin                                                                                 | NM_009635             |
| 10505299     | -12.29      | Bspry     | B-box and SPRY domain-containing                                                        | NM_138653             |
| 10368144     | -11.87      | Tnfaip3   | TNF- $\alpha$ -induced protein 3                                                        | NM_009397             |
| 10383206     | -11.71      |           |                                                                                         |                       |
| 10503334     | -11.67      | Gem       | GTP-binding protein (gene overexpressed in skeletal muscle)                             | NM_010276             |
| 10433264     | -11.23      | Glis2     | GLIS family zinc finger 2                                                               | NM_031184             |
| 10595718     | -11.22      | Chst2     | Carbohydrate sulfotransferase 2                                                         | NM_018763             |
| 10414914     | -11.19      | X76971    | cDNA sequence X76971                                                                    | AF479020              |
| 10608664     | -11.05      |           |                                                                                         |                       |
| 10494023     | -10.89      | Rorc      | RAR-related orphan receptor- $\gamma$                                                   | NM_011281             |
| 10445531     | -10.85      | Zfp318    | Zinc finger protein 318                                                                 | NM_207671             |
| 10497590     | -10.66      | Evi1      | Ecotropic viral integration site 1                                                      | NM_007963             |
| 10464251     | -10.40      | Atrn1     | Attractin-like 1                                                                        | NM_181415             |
| 10411156     | -10.08      | Scamp1    | Secretory carrier membrane protein 1                                                    | NM_029153             |
| 10500847     | -9.86       | Magi3     | Membrane-associated guanylate kinase, WW and PDZ domain-containing 3                    | NM_133853             |
| 10536898     | -9.44       | Irf5      | IFN regulatory factor 5                                                                 | NM_012057             |
| 10510643     | -9.03       | Plekhg5   | Pleckstrin homology domain-containing, family G (with RhoGef domain) member 5           | NM_001004156          |
| 10349081     | -9.00       |           |                                                                                         |                       |
| 10560481     | -8.98       | Fosb      | FBJ osteosarcoma oncogene B                                                             | NM_008036             |
| 10598448     | -8.86       | Kcnd1     | Potassium voltage-gated channel, Shal-related family, member 1                          | NM_008423             |
| 10537123     | -8.71       |           |                                                                                         |                       |
| 10452633     | -8.68       | Tgif1     | TGF- $\beta$ -induced factor homeobox 1                                                 | NM_009372             |
| 10573234     | -8.65       | Lphn1     | Latrophilin 1                                                                           | NM_181039             |
| 10475580     | -8.46       | Slc12a1   | Solute carrier family 12, member 1                                                      | NM_183354             |
| 10606235     | -8.33       | Zdhhc15   | Zinc finger, DHHC domain-containing 15                                                  | NM_175358             |
| 10530310     | -8.23       | EG666938  | Predicted gene, EG666938                                                                | XM_001477289          |
| 10469936     | -7.78       | Nrarp     | Notch-regulated ankyrin repeat protein                                                  | NM_025980             |
| 10548656     | -7.76       | EG381818  | Predicted gene, EG381818                                                                | XR_035022             |
| 10535043     | -7.71       | Pdgfa     | Platelet-derived growth factor- $\alpha$                                                | NM_008808             |
| 10451303     | -7.41       | Ttbk1     | $\tau$ -Tubulin kinase 1                                                                | BC094327              |
| 10409684     | -7.00       |           |                                                                                         |                       |

Table S2. Cont.

| Probe set ID | Fold change | Symbol         | Description                                                                                            | GenBank accession no. |
|--------------|-------------|----------------|--------------------------------------------------------------------------------------------------------|-----------------------|
| 10517336     | -6.82       | Clic4          | Chloride intracellular channel 4 (mitochondrial)                                                       | NM_013885             |
| 10361828     | -6.57       | Cited2         | Cbp/p300-interacting transactivator, with Glu/Asp-rich carboxyl-terminal domain, 2                     | NM_010828             |
| 10607619     | -6.55       | Cdkl5          | Cyclin-dependent kinase-like 5                                                                         | NM_001024624          |
| 10549282     | -6.50       | Itpr2          | Inositol 1,4,5-triphosphate receptor 2                                                                 | NM_019923             |
| 10558670     | -6.32       | Olfir541       | Olfactory receptor 541                                                                                 | NM_146962             |
| 10536494     | -6.31       | Cav2           | Caveolin 2                                                                                             | NM_016900             |
| 10354649     | -6.16       |                |                                                                                                        |                       |
| 10380381     | -6.14       | Tob1           | Transducer of ErbB-2.1                                                                                 | NM_009427             |
| 10355916     | -6.07       | Pax3           | Paired box gene 3                                                                                      | NM_008781             |
| 10560575     | -6.06       | Relb           | Avian reticuloendotheliosis viral (v-rel) oncogene-related B                                           | NM_009046             |
| 10376796     | -5.94       | Grap           | GRB2-related adaptor protein                                                                           | NM_027817             |
| 10560964     | -5.66       | Pou2f2         | POU domain, class 2, transcription factor 2                                                            | NM_011138             |
| 10404422     | -5.57       | Serpib6b       | Serine (or cysteine) peptidase inhibitor, clade B, member 6b                                           | NM_011454             |
| 10390032     | -5.46       |                |                                                                                                        |                       |
| 10376060     | -5.46       | Irf1           | IFN regulatory factor 1                                                                                | NM_008390             |
| 10457606     | -5.41       | Kctd1          | Potassium channel tetramerization domain-containing 1                                                  | NM_134112             |
| 10510270     | -5.28       | Mthfr          | 5,10-methylenetetrahydrofolate reductase                                                               | NM_010840             |
| 10405280     | -4.92       | Arl10          | ADP ribosylation factor-like 10                                                                        | NM_019968             |
| 10380137     | -4.88       | Bzrap1         | Benzodiazepine receptor-associated protein 1                                                           | NM_172449             |
| 10574825     | -4.83       | Rltpr          | RGD motif, leucine-rich repeats, tropomodulin domain and proline-rich-containing                       | BC115830              |
| 10369738     | -4.73       | Sirt1          | Sirtuin 1 (silent mating type information regulation 2, homolog) 1 ( <i>Saccharomyces cerevisiae</i> ) | NM_019812             |
| 10387372     | -4.40       | Jmjd3          | Jumonji domain-containing 3                                                                            | NM_001017426          |
| 10577685     | -4.36       | Adam3          | A disintegrin and metallopeptidase domain 3 (cyritestin)                                               | NM_009619             |
| 10344966     | -4.35       | Ly96           | Lymphocyte antigen 96                                                                                  | NM_016923             |
| 10480035     | -4.32       | Pfkfb3         | 6-phosphofructo-2-kinase/fructose-2,6-biphosphatase 3                                                  | NM_133232             |
| 10475027     | -4.16       | Tyro3          | TYRO3 protein tyrosine kinase 3                                                                        | NM_019392             |
| 10596403     | -4.12       | EG665033       | Predicted gene, EG665033                                                                               | XR_035671             |
| 10381574     | -4.04       | Rundc3a        | RUN domain-containing 3A                                                                               | NM_016759             |
| 10572724     | -3.94       |                |                                                                                                        | ENSMUST0000 0034259   |
| 10547976     | -3.91       | Tapbpl         | TAP-binding protein-like                                                                               | NM_145391             |
| 10546884     | -3.86       | Lhfp14         | Lipoma HMGIC fusion partner-like protein 4                                                             | NM_177763             |
| 10376326     | -3.74       | Igtp           | IFN- $\gamma$ -induced GTPase                                                                          | NM_018738             |
| 10576692     | -3.71       |                |                                                                                                        |                       |
| 10472893     | -3.55       | B230120 H23Rik | RIKEN cDNA B230120H23 gene                                                                             | NM_023057             |
